# Supplementary material for: Probing the magnetic superexchange couplings between terminal CuII ions in heterotrinuclear bis(oxamidato) type complexes
Source: publisher site journal article supplement (doi:10.3762/bjnano.8.82), 2017-04-06
Supplement: Additional file 1 [file 2190-4286-8-82-S1.pdf]

# Supporting Information

for

## Probing the magnetic superexchange couplings between terminal Cu<sup>II</sup> ions in heterotrinary bis(oxamidato) type complexes

Mohammad A. Abdulmalic<sup>1</sup>, Saddam Weheabby<sup>1</sup>, Francois E. Meva<sup>2</sup>, Azar Aliabadi<sup>3,4</sup>, Vladislav Kataev<sup>3</sup>, Bernd Büchner<sup>3,5</sup>, Frederik Schleife<sup>6</sup>, Berthold Kersting<sup>6</sup> and Tobias Rüffer\*<sup>1,§</sup>

Address: <sup>1</sup>Department of Inorganic Chemistry, Faculty of Natural Sciences, Chemnitz University of Technology, Strasse der Nationen 62, D-09111 Chemnitz, Germany, <sup>2</sup>Department of Pharmaceutical Sciences, Faculty of Medicine and Pharmaceutical Sciences, University of Douala, BP 2701, Cameroon, <sup>3</sup>Leibniz Institute for Solid State and Materials Research IFW Dresden, D-01171 Dresden, Germany, <sup>4</sup>Institut für Nanospektroskopie (EM-ISPEK), Helmholtz-Zentrum Berlin für Materialien und Energie, Kekuléstr. 5, D-12489 Berlin, Germany, <sup>5</sup>Institute for Solid State Physics, Technical University Dresden, D-01062 Dresden, Germany and <sup>6</sup>Department of Inorganic Chemistry, Faculty of Chemistry and Mineralogy, University of Leipzig, Johannisallee 29, D-04103 Leipzig, Germany

Email: Tobias Rüffer - tobias.rueffer@chemie.tu-chemnitz.de

\* Corresponding author

§ Phone: +49 (0)371-531-31836

## IR spectra of 1–3

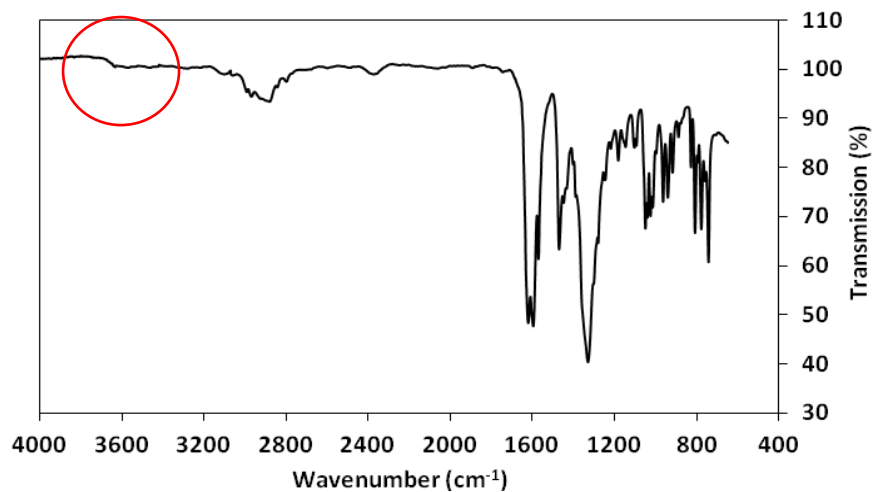

**Figure S1:** IR spectrum of **1**.

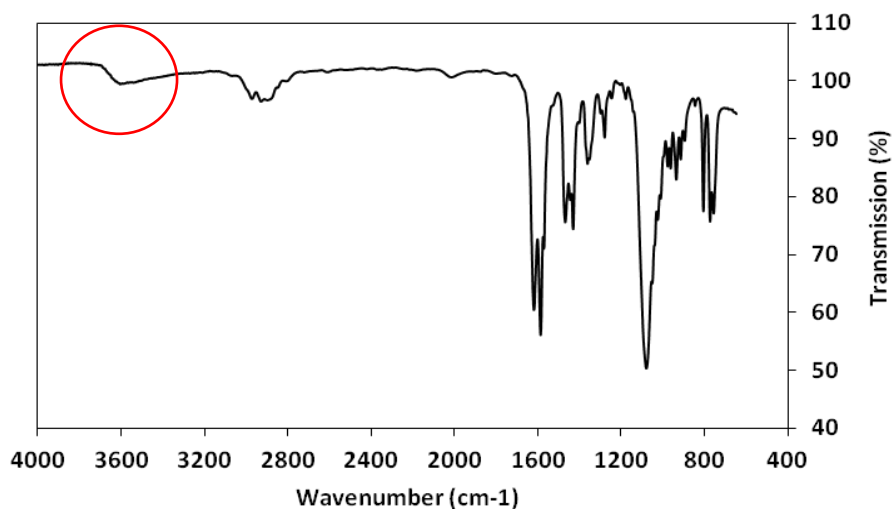

**Figure S2:** IR spectrum of **2**.

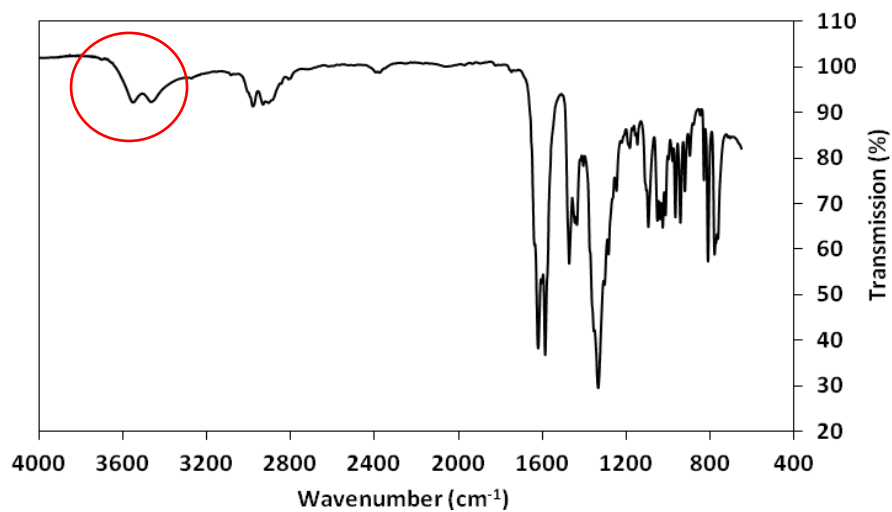

**Figure S3:** IR spectrum of **3**.

**Note:** Due to the aerobic sample handling for obtaining KBr tablets all three samples caught water (indicated by circles) out of air moisture as they are (extremely) hygroscopic, especially complex **3**.

**Table S1:** Experimental and calculated  $\chi_M T$  [ $\text{cm}^3 \cdot \text{mol}^{-1} \cdot \text{K}$ ] and  $1/\chi_M$  [ $\text{mol}/\text{cm}^3$ ] values of **2**.

| $T / \text{K}$ | $\chi_M T$ (exp) | $\chi_M T$ (fit) | $1/\chi_M$ (exp) | $1/\chi_M$ (fit) |
|----------------|------------------|------------------|------------------|------------------|
| 2.00068        | 0.71488          | 0.71566          | 2.79862          | 2.79557          |
| 3.09532        | 0.74842          | 0.74562          | 4.13581          | 4.15134          |
| 3.98311        | 0.76130          | 0.75763          | 5.23198          | 5.25733          |
| 5.53291        | 0.76901          | 0.76949          | 7.19485          | 7.19036          |
| 6.00596        | 0.76553          | 0.77195          | 7.84549          | 7.78024          |
| 7.00808        | 0.77345          | 0.77615          | 9.06081          | 9.02929          |
| 8.00156        | 0.77879          | 0.77939          | 10.27435         | 10.26644         |
| 9.00345        | 0.78205          | 0.78205          | 11.51263         | 11.51263         |
| 10.00316       | 0.78417          | 0.78427          | 12.75637         | 12.75474         |
| 11.01117       | 0.78630          | 0.78619          | 14.00378         | 14.00574         |
| 11.99986       | 0.78700          | 0.78786          | 15.24760         | 15.23095         |
| 13.00332       | 0.78963          | 0.78936          | 16.46761         | 16.47324         |
| 14.00689       | 0.79174          | 0.79074          | 17.69127         | 17.71365         |
| 15.00135       | 0.79296          | 0.79198          | 18.91817         | 18.94158         |
| 16.00161       | 0.79379          | 0.79315          | 20.15849         | 20.17476         |
| 17.00127       | 0.79480          | 0.79424          | 21.39063         | 21.40571         |
| 18.00134       | 0.79555          | 0.79527          | 22.62754         | 22.63551         |
| 19.00144       | 0.79637          | 0.79625          | 23.86007         | 23.86366         |
| 19.99654       | 0.79710          | 0.79718          | 25.08661         | 25.08410         |
| 30.00246       | 0.80461          | 0.80511          | 37.28820         | 37.26504         |
| 39.99930       | 0.81109          | 0.81180          | 49.31549         | 49.27236         |
| 50.03473       | 0.81729          | 0.81802          | 61.22029         | 61.16566         |
| 60.09363       | 0.82323          | 0.82401          | 72.99738         | 72.92828         |
| 70.12439       | 0.82937          | 0.82985          | 84.55139         | 84.50249         |
| 80.16077       | 0.83554          | 0.83560          | 95.93888         | 95.93199         |
| 90.19693       | 0.84151          | 0.84129          | 107.18462        | 107.21265        |
| 100.2365       | 0.84713          | 0.84694          | 118.32481        | 118.35136        |
| 110.2696       | 0.85288          | 0.85256          | 129.29087        | 129.33940        |
| 120.2901       | 0.85831          | 0.85815          | 140.14762        | 140.17375        |
| 130.33749      | 0.86450          | 0.86374          | 150.76633        | 150.89899        |
| 140.36819      | 0.87033          | 0.86931          | 161.28157        | 161.47081        |
| 150.39101      | 0.87562          | 0.87486          | 171.75374        | 171.90294        |
| 160.42270      | 0.88102          | 0.88040          | 182.08747        | 182.21570        |
| 170.47180      | 0.88683          | 0.88595          | 192.22602        | 192.41695        |
| 180.50751      | 0.89265          | 0.89149          | 202.21533        | 202.47845        |
| 190.55800      | 0.89861          | 0.89703          | 212.05862        | 212.43214        |
| 200.56650      | 0.90369          | 0.90254          | 221.94171        | 222.22450        |
| 210.54221      | 0.90882          | 0.90803          | 231.66547        | 231.86702        |
| 220.51990      | 0.91393          | 0.91352          | 241.28752        | 241.39581        |
| 230.64191      | 0.91979          | 0.91909          | 250.75497        | 250.94595        |
| 240.45390      | 0.92414          | 0.92448          | 260.19207        | 260.09638        |
| 250.44949      | 0.92975          | 0.92997          | 269.37294        | 269.30921        |
| 260.44421      | 0.93522          | 0.93546          | 278.48443        | 278.41298        |
| 270.44989      | 0.94028          | 0.94095          | 287.62697        | 287.42217        |
| 280.43549      | 0.94559          | 0.94643          | 296.57197        | 296.30875        |
| 290.43491      | 0.95112          | 0.95192          | 305.36095        | 305.10433        |
| 300.43649      | 0.95644          | 0.95741          | 314.11954        | 313.80129        |
| 310.28259      | 0.96171          | 0.96281          | 322.63634        | 322.26773        |
| 320.44299      | 0.96771          | 0.96838          | 331.13535        | 330.90625        |
| 330.43301      | 0.97384          | 0.97386          | 339.30934        | 339.30237        |
